# Supplementary material for: Integrating heterogeneous thesauruses for Chinese synonyms
Source: Springer Nature journal article supplement (doi:10.1007/s11704-020-9253-3), 2020-10-02
Supplement: 11704_2020_9253_MOESM2_ESM.pdf [file 11704_2020_9253_MOESM2_ESM.pdf]

# Integrating heterogeneous thesauruses for Chinese synonyms

Jianbing ZHANG, Peng WU, Yingjie ZHANG,  
Shujian HUANG, Xinyu DAI, Jiajun CHEN

Frontiers of Computer Science, DOI: [10.1007/s11704-020-9253-3](https://doi.org/10.1007/s11704-020-9253-3)

# Problems & Ideas

- Can we build a better Chinese synonym resource by integrating the heterogeneous Chinese Concept Dictionary (CCD) and Tongyici-Cilin (Cilin) together?
  - CCD: cover rich semantic relations but miss many Chinese-specific words
  - Cilin: cover many Chinese words but miss clear relations between them

Table 1: Statistics of CCD Categories and Cilin Classes for each part-of-speech (POS)

| POS       | Class     | Cilin  |       | CCD         |          |
|-----------|-----------|--------|-------|-------------|----------|
|           |           | Medium | Class | Subdivision | Category |
| Noun      | A B C D   | 48     | –     | 588         | 26       |
| Verb      | F G H I J | 34     |       | 567         | 15       |
| Adjective | E         | 6      | –     | 179         | 3        |
| Adverb    | K         | 1      |       | 35          | 1        |
| Pronoun   | A B C E   | 5      | –     | 8           | 0        |
| Others    | K L       | 6      |       | 48          | 0        |

- Ideas: integrate CCD and Cilin by
  - direct mapping that ignores the inner structure of CCD and Cilin
  - hierarchical mapping that considers their structure

# Main Experimental Results

Table 2: A Comparison of some metrics between direct and hierarchical mappings

|                                        | Direct | Hierarchical |
|----------------------------------------|--------|--------------|
| # of synonym set                       | 66,815 | 125,146      |
| # of synonym set except single word    | 38,462 | 67,540       |
| average # of words in synonym set      | 5.98   | 2.21         |
| # of shared synonym set                |        | 58,332       |
| # of unique synonym set                | 8,517  | 66,814       |
| average distance of unique synonym set | 2.9868 | 2.1643       |

- Hierarchical mapping gets more synonym sets, because it keeps the synonym sets which contain the same word in mind, and meanwhile has different semantics via using the high-level words.
- The sets generated by direct mapping are larger since this method is straightforward and simple.
- For the unique set, hierarchical mapping can get closer distance in synonym set than direct mapping.
